# Supplementary material for: Modulation of Oncogenic KRAS Signaling by Branched Actin-driven Cell Membrane Protrusions
Source: Research Square preprint supplement (doi:10.21203/rs.3.rs-9293424/v1), 2026-06-03
Supplement: Supplementary file [file d74a785550315bb48b0755f0.pdf]

## Supplementary Table 1

### Plasmid List

| Plasmid                                 | Source                                 |
|-----------------------------------------|----------------------------------------|
| pLVX_IRES_Neomycin empty vector         | Wesley Burford (UTSW)                  |
| pLVX_IRES_Puromycin empty vector        | Wesley Burford (UTSW)                  |
| pTRE3G empty vector                     | This study                             |
| pLVX:mRuby2-tractin                     | Wesley Burford (UTSW)                  |
| pLVX:CyOFP1-tractin                     | Wesley Burford (UTSW)                  |
| pLVX:mEmerald-tractin                   | Wesley Burford (UTSW)                  |
| pLVX:Arp3-EGFP                          | Tadamoto Isogai (UTSW)                 |
| pLVX:EGFP-KRASG12V                      | This study                             |
| pLVX:SNAP-tag-KRASG12V                  | This study                             |
| pLVX:nSNAP-KRASG12V                     | This study                             |
| pLVX:RBD-cSNAP                          | This study                             |
| pLL7.0: mTiam1(64-437)-tgRFPT-SSPB R73Q | Addgene #60418                         |
| pLL7.0: Venus-iLID-CAAX                 | Addgene #60411                         |
| pLVX:EGFP-CAAX                          | This study                             |
| pTRE3G:myr-TIAM1DH/PH                   | This study                             |
| pTRE3G:NF2WT                            | This study                             |
| pTRE3G:NF2S518A                         | This study                             |
| pMD.2g                                  | Addgene #12259                         |
| psPax2                                  | Addgene #12260                         |
| pSpCas9(BB)-2A-Puro                     | Addgene # 62988                        |
| pMA-Tia1L                               | Tilman Bürckstümmer (Horizon Genomics) |

nSNAP: Amino terminus (N-terminus) fragment of the SNAP-tag protein (amino acids 1-91)

cSNAP: Carboxyl terminus (C-terminus) fragment of the SNAP-tag protein (amino acids 92-182).

RBD: RAS Binding Domain of the c-RAF1 effector kinase (amino acids 51-131).
